# Supplementary material for: Reconstruction of the Metabolic Potential of Acidophilic Sideroxydans Strains from the Metagenome of an Microaerophilic Enrichment Culture of Acidophilic Iron-Oxidizing Bacteria from a Pilot Plant for the Treatment of Acid Mine Drainage Reveals Metabolic Versatility and Adaptation to Life at Low pH
Source: Front Microbiol. 2016 Dec 22;7:2082. doi: 10.3389/fmicb.2016.02082 (PMC5178258; doi:10.3389/fmicb.2016.02082)
Supplement: Supplementary file 4 [file Table4.XLSX]

## Sheet: A) Phosphate metabolism
A) Phosphorus metabolism: phosphate and phosphonate assimilation, polyphosphate storage
pathway	name	gene name (if assigned)	EC number	Locus_Tag	Locus_Tag and contig
Phosphate uptake					GALL_all_contig000001	GALL_all_contig000003	GALL_all_contig000006	GALL_all_contig000009	GALL_all_contig000013	GALL_all_contig000019	GALL_all_contig000023	GALL_all_contig000030	GALL_all_contig000047	GALL_all_contig000084	GALL_all_contig000102	GALL_all_contig000118
pho-regulon	phosphate ABC transporter substrate-binding protein	pstS			GALL_all_01140	GALL_all_17590		GALL_all_39270	GALL_all_50660			GALL_all_91840
	phosphate transport system permease protein PstC	pstC						GALL_all_39260	GALL_all_50650			GALL_all_91830
	phosphate transport system permease protein PstA	pstA						GALL_all_39250	GALL_all_50640	GALL_all_67000		GALL_all_91820
	phosphate import ATP-binding protein PstB	pstB						GALL_all_39240	GALL_all_50630			GALL_all_91810	GALL_all_120820
	alkaline phosphatase synthesis sensor protein PhoR	phoR				GALL_all_14310	GALL_all_25190							GALL_all_165440		GALL_all_194530
	phosphate regulon transcriptional regulatory protein PhoB	phoB					GALL_all_25200, GALL_all_28380				GALL_all_76330			GALL_all_165430	GALL_all_181990	GALL_all_194540
	phosphate transport system regulatory protein PhoU	phoU			GALL_all_01420	GALL_all_17030				GALL_all_66550
polyphosphate storage	exopolyphosphatase	ppx	3.6.1.11		GALL_all_01430	GALL_all_17020				GALL_all_66540
	polyphosphate kinase	ppK	2.7.4.1			GALL_all_17370	GALL_all_28280			GALL_all_66780	GALL_all_76400				GALL_all_182070
Phosphonate uptake and utilization				GALL_all_contig000005	GALL_all_contig000026	GALL_all_contig000031	GALL_all_contig000068	GALL_all_contig000077
	putative transcriptional regulator PhnF	phnF						GALL_all_158100
	phosphate-import protein PhnD precursor	phnD				GALL_all_93270		GALL_all_158110
	phosphate-import ATP-binding protein PhnC	phnC	3.6.3.27					GALL_all_158120
	phosphate-import permease protein PhnE	phnE				GALL_all_93280		GALL_all_158130
	phosphate-import permease protein PhnE	phnE						GALL_all_158140
	phosphonate metabolism protein PhnG	phnG						GALL_all_158150
	alpha-D-ribose 1-methylphosphonate 5-triphosphate synthase subunit PhnH	phnH	2.7.8.37					GALL_all_158160
	alpha-D-ribose 1-methylphosphonate 5-triphosphate synthase subunit PhnI	phnI	2.7.8.37					GALL_all_158170
	alpha-D-ribose 1-methylphosphonate 5-phosphate C-P lyase	phnJ	4.7.1.1					GALL_all_158180
	putative phosphonates utilization ATP-binding protein PhnK	phnK						GALL_all_158190
	alpha-D-ribose 1-methylphosphonate 5-triphosphate synthase subunit PhnL	phnL	2.7.8.37					GALL_all_158200
	alpha-D-ribose 1-methylphosphonate 5-triphosphate diphosphatase	phnM	3.6.1.63					GALL_all_158210
	ribose 1,5-bisphosphate phosphokinase PhnN	phnN	2.7.4.23					GALL_all_158220
	phosphoribosyl 1,2-cyclic phosphodiesterase	phnP	3.1.4.55					GALL_all_158230
	ABC transporter, phosphonate, periplasmic substrate-binding protein			GALL_all_24440	GALL_all_84350
	phosphonate dehydrogenase	ptxD	1.20.1.1			GALL_all_93290	GALL_all_147320

## Sheet: B) Nitrogen metabolism
B) Nitrogen metabolism: nitrogen assimilation systems and nitrogen storage
pathway	name	gene name (if assigned)	EC number	Locus_Tag and contig
Nitrogen assimilation				contig000001	contig000009	contig000013	contig000035	contig000055	contig000059	contig000112
ammonium assimilation	L-glutamine synthetase	glnT	6.3.1.2					GALL_all_131910
nitrate assimilation	assimilators nitrate reductase, catalytic subunit	nasA	1.7.99.4	GALL_all_03650	GALL_all_39690				GALL_all_136380
	assimilatory nitrite reductase [NAD(P)H] small subunit	nasE	1.7.1.4	GALL_all_03640	GALL_all_39680				GALL_all_136370
	nitrite reductase [NAD(P)H]	nasD	1.7.1.4	GALL_all_03630	GALL_all_39670				GALL_all_136360
urea hydrolysis	urease accessory protein UreG	ureG	3.5.1.5							GALL_all_190270
	urease accessory protein UreF	ureF	3.5.1.5							GALL_all_190280
	urease accessory protein UreE	ureE	3.5.1.5							GALL_all_190290
	urease subunit alpha	ureC								GALL_all_190300
	urease subunit beta	ureB								GALL_all_190310
	urease subunit gamma	ureA								GALL_all_190320
	urease accessory protein UreD	ureD								GALL_all_190330
nitrogen fixation	nitrogenase-stabilizing/protective protein NifW	nifW			GALL_all_36420		GALL_all_101280
	NifZ domain protein				GALL_all_36430		GALL_all_101260
	ADP-ribosyl-[dinitrogen reductase] glycohydrolase	draG	3.2.2.24		GALL_all_36740	GALL_all_48470	GALL_all_100960
	NifQ				GALL_all_36750	GALL_all_48480	GALL_all_100950
	ferredoxin / 2Fe-2S iron-sulfur cluster binding domain protein				GALL_all_36760		GALL_all_100940
	ferredoxin				GALL_all_36770	GALL_all_48490	GALL_all_100930
	nitrogenase-associated protein				GALL_all_36790	GALL_all_48500	GALL_all_100910
	ferredoxin	fdx			GALL_all_36800	GALL_all_48510	GALL_all_100900
	FeMo cofactor biosynthesis protein NifB	nifB			GALL_all_36810	GALL_all_48520	GALL_all_100890
	dinitrogenase iron-molybdenum cofactor biosynthesis protein				GALL_all_36820
	ferredoxin					GALL_all_48530
	nitrogen fixation protein of unknown function / Nif11-like leader peptide family natural product precursor				GALL_all_36950	GALL_all_48690	GALL_all_100740
	nif-specific transcriptional activator NifA	nifA			GALL_all_36960	GALL_all_48700	GALL_all_100730
	nitrogen fixation negative regulator	nifL	2.7.13.3		GALL_all_36970	GALL_all_48710	GALL_all_100720
	NAD(+)--dinitrogen-reductase ADP-D-ribosyltransferase	draT	2.4.2.37		GALL_all_37120	GALL_all_48830	GALL_all_100540
	nitrogenase iron protein	nifH1	1.18.6.1		GALL_all_37130	GALL_all_48840	GALL_all_100530
	nitrogenase molybdenum-iron protein alpha chain	nifD	1.18.6.1		GALL_all_37140	GALL_all_48850	GALL_all_100520
	nitrogenase molybdenum-iron protein beta chain	nifK	1.18.6.1		GALL_all_37150	GALL_all_48860	GALL_all_100510
	nitrogen fixation protein NifT/FixU protein				GALL_all_37160	GALL_all_48870	GALL_all_100500
	ferredoxin	fdxN			GALL_all_37170	GALL_all_48880	GALL_all_100490
	dinitrogenase iron-molybdenum cofactor				GALL_all_37180	GALL_all_48890	GALL_all_100480
	molybdate ABC transporter substrate-binding protein	modA			GALL_all_37300	GALL_all_48950	GALL_all_100360
	molybdenum transport protein modE	modE			GALL_all_37310	GALL_all_48960	GALL_all_100350
	molybdate ABC transporter substrate-binding protein	modA			GALL_all_37320	GALL_all_48970	GALL_all_100340
	molybdenum ABC transporter permease subunit	modB			GALL_all_37330	GALL_all_48980	GALL_all_100330
	nitrogenase iron-molybdenum cofactor biosynthesis protein NifE		1.18.6.1		GALL_all_37490	GALL_all_49060	GALL_all_100170
	nitrogenase molybdenum-iron cofactor biosynthesis protein NifN		1.18.6.1		GALL_all_37500	GALL_all_49070	GALL_all_100160
	dinitrogenase iron-molybdenum cofactor biosynthesis protein				GALL_all_37510	GALL_all_49080	GALL_all_100150
	SoxR reducing system protein RseC				GALL_all_37520	GALL_all_49090	GALL_all_100140
	ferredoxin III, nif-specific	fdxB			GALL_all_37550	GALL_all_49120	GALL_all_100110
	ferredoxin, 2Fe-2s				GALL_all_37560	GALL_all_49130	GALL_all_100100
	nitrogen fixation protein NifZ				GALL_all_37580	GALL_all_49150	GALL_all_100080
Uptake systems for nitrogen compounds				contig000001	contig000005	contig000006	contig000007	contig000009	contig000011	contig000013	contig000023	contig000025	contig000030	contig000059	contig000112
ammonium	ammonia channel precursor	amtB				GALL_all_27260		GALL_all_39470	GALL_all_43440	GALL_all_50910	GALL_all_77450	GALL_all_81100	GALL_all_92030
nitrate/nitrite	nitrate/nitrite sensor protein NarX	narX			GALL_all_23930		GALL_all_31350
	nitrate ABC transporter substrate-binding protein	nrtA		GALL_all_03600	GALL_all_03600			GALL_all_39640						GALL_all_136330
	nitrate ABC transporter permease			GALL_all_03610	GALL_all_03610			GALL_all_39650						GALL_all_136340
	nitrate ABC transporter ATP-binding protein			GALL_all_03620	GALL_all_03620			GALL_all_39660						GALL_all_136350
	urea ABC transporter permease protein UrtC	urtE													GALL_all_190370
	urea ABC transporter ATP-binding protein UrtE	urtD													GALL_all_190380
	urea ABC transporter ATP-binding protein UrtD	urtC													GALL_all_190390
Nitrogen storage				contig000008	contig000020	contig000031
cyanophycin	cyanophycin sythethase CphA1	cpA1		GALL_all_33050	GALL_all_68750	GALL_all_93330
	cyanophycin sythethase CphA2	cpA2		GALL_all_33060	GALL_all_68760	GALL_all_93340

## Sheet: C) Sulfur metabolism
D) Sulfur metabolism: sulfate uptake and assimilation
pathway	name	gene name (if assigned)	EC number	Locus_Tag and contig
Sulfate uptake and assimilation				Gall_all_contig000001	Gall_all_contig000005	Gall_all_contig000007	Gall_all_contig000009	Gall_all_contig000011	Gall_all_contig000013	Gall_all_contig000030	Gall_all_contig000035	Gall_all_contig000068	Gall_all_contig000079	Gall_all_contig000086	Gall_all_contig000105	Gall_all_contig000177
sulfate transporter	sulfate permease				GALL_all_24090	GALL_all_31580		GALL_all_43200
assimilation	sulfate adenylyltransferase				GALL_all_24060	GALL_all_31550		GALL_all_43230
	adenylylsulfate reductase subunit alpha		2.7.7.4		GALL_all_24020	GALL_all_31510		GALL_all_43270
	adenylylsulfate reductase subunit beta		2.7.7.4		GALL_all_24030	GALL_all_31520		GALL_all_43260
	adenylylsulfate reductase membrane anchor		1.8.4.9		GALL_all_24040	GALL_all_31530		GALL_all_43250
	sulfite reductase (ferredoxin)	sir	1.8.1.1				GALL_all_38940		GALL_all_50320	GALL_all_91520
	thioredoxin-dependent 5'-adenylylsulfate reductase	cysH	1.8.4.10				GALL_all_38950		GALL_all_50330	GALL_all_91530
	sulfate adenylyltransferase subunit 2	cysD	2.7.7.4				GALL_all_38960		GALL_all_50340	GALL_all_91540
	bifunctional enzyme CysN/CysC	cysNC					GALL_all_38970		GALL_all_50360	GALL_all_91550
	cysteine synthase A	cysK	2.5.1.47	GALL_all_08870										GALL_all_166650
	cysteine synthase B	cysM	2.5.1.47	GALL_all_08880										GALL_all_166640
	serine O-acetyltransferase	cysE	2.3.1.30	GALL_all_06440			GALL_all_36400				GALL_all_101300	GALL_all_146580	GALL_all_160200		GALL_all_184520	GALL_all_231040

## Sheet: D) Carbon metabolism
A) Carbon metabolism: carbon fixation, central carbon metabolism, lactate utilization
pathway	name	gene name (if assigned)	EC number	Locus_Tag and contig
Carbon fixation				GALL_all_contig000001	GALL_all_contig000003	GALL_all_contig000005	GALL_all_contig000006	GALL_all_contig000007	GALL_all_contig000008	GALL_all_contig000009	GALL_all_contig000011	GALL_all_contig000013	GALL_all_contig000019	GALL_all_contig000020	GALL_all_contig000021	GALL_all_contig000022	GALL_all_contig000023	GALL_all_contig000025	GALL_all_contig000026	GALL_all_contig000029	GALL_all_contig000030	GALL_all_contig000035	GALL_all_contig000047	GALL_all_contig000056	GALL_all_contig000059	GALL_all_contig000076	GALL_all_contig000079	GALL_all_contig000082	GALL_all_contig000084	GALL_all_contig000088	GALL_all_contig000102	GALL_all_contig000112	GALL_all_contig000118	GALL_all_contig000121	GALL_all_contig000139	GALL_all_contig000148	GALL_all_contig000186	GALL_all_contig000188	GALL_all_contig000247	GALL_all_contig000769	GALL_all_contig000910	GALL_all_contig001056
Calvin-Benson-Bassham cycle	the ribulose-1,5-bisphosphate carboxylase/oxygenase (RuBisCO), small subunit	cbbL	4.1.1.39							GALL_all_37840				GALL_all_69760							GALL_all_90290
	the ribulose-1,5-bisphosphate carboxylase/oxygenase (RuBisCO), large subunit	cbbS	4.1.1.39							GALL_all_37830				GALL_all_69750							GALL_all_90280
	the ribulose-1,5-bisphosphate carboxylase/oxygenase (RuBisCO), large subunit	cbbM	4.1.1.39				GALL_all_27670										GALL_all_77050	GALL_all_80700
	phosphoglycerate kinase	pgk	2.7.2.3				GALL_all_27710										GALL_all_77000	GALL_all_80650
	glyceraldehyde-3-phosphate dehydrogenase	gapA	1.2.1.12				GALL_all_27720										GALL_all_76990	GALL_all_80640
	fructose-bisphosphate aldolase	fbaA	4.1.2.13		GALL_all_17230		GALL_all_27690			GALL_all_37770			GALL_all_66640	GALL_all_69690	GALL_all_72950	GALL_all_75260	GALL_all_77020	GALL_all_80670	GALL_all_82840		GALL_all_90220
	fructose-1,6-bisphosphatase	fbp	3.1.3.11	GALL_all_01150			GALL_all_27640										GALL_all_77080	GALL_all_80730																					GALL_all_262350
	transketolase	tktA	2.2.1.1		GALL_all_17200		GALL_all_27730						GALL_all_66620				GALL_all_76980	GALL_all_80630
	ribose-5-phosphate isomerase	rpiA	5.3.1.6	GALL_all_01410	GALL_all_17040								GALL_all_66560																												GALL_all_366770
	ribulose-phosphate 3-epimerase	rpe	5.1.3.1				GALL_all_25750													GALL_all_88920									GALL_all_164840				GALL_all_194810 GALL_all_194820 GALL_all_194830	GALL_all_196830
	Phosphoribulokinase	prkB	2.7.1.19	GALL_all_00740									GALL_all_67790
	triosephosphate isomerase	tpiA	5.3.1.1							GALL_all_39280		GALL_all_50670									GALL_all_91850
carboxysome	carboxysome shell peptide mid-region
	carboxysome shell carbonic anhydrase						GALL_all_27610										GALL_all_77110	GALL_all_80760
	carboxysome peptide A
	carboxysome peptide B
	carboxysome shell protein
	carboxysome shell protein
Central carbon metabolism
glycolysis/gluconeogenesis	phosphoglucomutase	pgm	5.4.2.2	GALL_all_08090												GALL_all_73830												GALL_all_163640		GALL_all_168560						GALL_all_215250	GALL_all_236120			GALL_all_354530
	glucose-6-phosphate isomerase	pgi	5.3.1.9			GALL_all_23200		GALL_all_30850			GALL_all_43970
	phosphofructokinase	pfkA	2.7.1.11													GALL_all_74090												GALL_all_163380
	fructose 1,6-bisphosphatase	fbp	3.1.3.11	GALL_all_01150			GALL_all_27640										GALL_all_77080	GALL_all_80730																					GALL_all_262350
	fructose-bisphosphate aldolase	fbaA	4.1.2.13		GALL_all_17230		GALL_all_27690			GALL_all_37770			GALL_all_66640	GALL_all_69690	GALL_all_72950	GALL_all_75260	GALL_all_77020	GALL_all_80670	GALL_all_82840		GALL_all_90220
	glyceraldehyde-3-phosphate dehydrogenase	gapA	1.2.1.12				GALL_all_27720										GALL_all_76990	GALL_all_80640
	triosephosphate isomerase	tpiA	5.3.1.1							GALL_all_39280		GALL_all_50670									GALL_all_91850
	phosphoglycerate kinase	pgk	2.7.2.3				GALL_all_27710										GALL_all_77000	GALL_all_80650
	phosphoglycerate mutase	gpmA	5.4.2.1	GALL_all_02530	GALL_all_15770								GALL_all_65450		GALL_all_73430	GALL_all_74500												GALL_all_162990
	pyruvate kinase	pyk	2.7.1.4				GALL_all_27700										GALL_all_77010	GALL_all_80660
	pyruvate dehydrogenase E1 component	aceE	1.2.4.1	GALL_all_01250	GALL_all_17520								GALL_all_66930
	pyruvate dehydrogenase E2 component			GALL_all_01240	GALL_all_17530						GALL_all_44490		GALL_all_66940
	dihydrolipoamide dehydrogenase (E3 component)	lpd/pdhD	1.8.1.4	GALL_all_04150	GALL_all_14610																														GALL_all_209620
	acetyl-coenzyme A synthetase	acs	6.2.1.1			GALL_all_21540		GALL_all_30230				GALL_all_51630				GALL_all_75650									GALL_all_137540	GALL_all_155920
Tricarboxylic acid (TCA) cycle	citrate synthase	gltA	2.3.3.1			GALL_all_23140		GALL_all_30130			GALL_all_44510
	aconitate hydratase 1	acnA	4.2.1.3			GALL_all_22540		GALL_all_29400			GALL_all_45190
	isocitrate dehydrogenase (NADP)	icd	1.1.1.42					GALL_all_30060			GALL_all_44580	GALL_all_49650
	Isocitrate/isopropylmalate dehydrogenase / 3-isopropylmalate dehydrogenase		1.1.1.42 / 1.1.1.85	GALL_all_07870																										GALL_all_168300						GALL_all_215040
	2-oxoglutarate dehydrogenase E1 component	sucA	1.2.4.2			GALL_all_23150		GALL_all_30140			GALL_all_44500
	2-oxoglutarate dehydrogenase E2 component	sucB	2.3.1.61			GALL_all_23160		GALL_all_30150			GALL_all_44490
	dihydrolipoamide dehydrogenase (E3 component)	lpd/pdhD	1.8.1.4	GALL_all_04150	GALL_all_14610																														GALL_all_209620
	succinyl-CoA synthetase (ADP-forming), alpha subunit	sucD	6.2.1.5						GALL_all_34700					GALL_all_70290									GALL_all_120450
	succinyl-CoA synthetase (ADP-forming), beta subunit	sucC	6.2.1.5						GALL_all_34710					GALL_all_70300									GALL_all_120440
	succinate dehydrogenase, subunit B	sdhB	1.3.5.1			GALL_all_23120		GALL_all_30110			GALL_all_44530
	succinate dehydrogenase, subunit A	sdhA	1.3.5.1			GALL_all_23110		GALL_all_30100			GALL_all_44540
	succinate dehydrogenase, hydrophobic membrane anchor protein	sdhD	1.3.5.1			GALL_all_23100		GALL_all_30090			GALL_all_44550
	succinate dehydrogenase, subunit C	sdhC	1.3.5.1			GALL_all_23090		GALL_all_30080			GALL_all_44560
	fumarase, class I	fumA/fumB	4.2.1.2			GALL_all_22140		GALL_all_28910			GALL_all_45660																															GALL_all_377750
	malate dehydrogenase	mdh	1.1.1.37			GALL_all_23080		GALL_all_30070			GALL_all_44570
L-lactate utilization				GALL_all_contig000001	GALL_all_contig000035	GALL_all_contig000079	GALL_all_contig000112	GALL_all_contig000188
	pyruvate dehydrogenase complex repressor	pdhR			GALL_all_99670		GALL_all_190060
	lactate utilization protein A	lutA		GALL_all_07030	GALL_all_99680	GALL_all_159470	GALL_all_190070	GALL_all_236840
	lactate utilization protein C	lutC			GALL_all_99690		GALL_all_190080
	lactate utilization protein B	lutB			GALL_all_99700		GALL_all_190090
	L-lactate permease	lutP			GALL_all_99710		GALL_all_190100

## Sheet: E) Energy metabolism
E) Energy metabolism: ferrous iron oxidation, ATPsynthesis, other redox reactions connected to the quinol pool, putative formate dehydrogen, Rnf complex and putative pathway for the oxidation of reduced sulfur compounds
pathway	name	subunit assignment or other information	gene name (if assigned)	EC number	Locus_Tag and contig
Ferrous iron oxidation					Gall_all_contig000001	Gall_all_contig000003	Gall_all_contig000005	Gall_all_contig000006	Gall_all_contig000007	Gall_all_contig000008	Gall_all_contig000009	Gall_all_contig000011	Gall_all_contig000013	Gall_all_contig000019	Gall_all_contig000020	Gall_all_contig000023	Gall_all_contig000025	Gall_all_contig000030	Gall_all_contig000031	Gall_all_contig000059	Gall_all_contig000076	Gall_all_contig000077	Gall_all_contig000079	Gall_all_contig000100	Gall_all_contig000106	Gall_all_contig000139	Gall_all_contig000150	Gall_all_contig000154	Gall_all_contig000171	Gall_all_contig000177	Gall_all_contig000187
outer membrane	metal oxidation	CymA	cymA			GALL_all_14490																				GALL_all_209740
	hypothetical protein, Iro-like	MtoB	mtoB			GALL_all_14500																				GALL_all_209730
		MtoA	mtoA			GALL_all_14510																				GALL_all_209720
	cytochrome C					GALL_all_14520																				GALL_all_209710
periplasm	cytochrome c4	(equivalent to CycC1 - FERRO_02680)			GALL_all_02140	GALL_all_16150								GALL_all_65820
	cytochrome c				GALL_all_02130	GALL_all_16160								GALL_all_65830
uphill transfer	bc1 complex	iron-sulfur subunit	petA	1.10.2.2				GALL_all_26830								GALL_all_77870	GALL_all_81580
		cytochrome b subunit	petB	1.10.2.2				GALL_all_26820								GALL_all_77880	GALL_all_81590
		cytochrome c1	petC	1.10.2.2				GALL_all_26810								GALL_all_77890	GALL_all_81600
	NADH-quinone oxidoreductase	subunit A	nuoA	1.6.99.5							GALL_all_39310		GALL_all_50760					GALL_all_91880
		subunit C	nuoB	1.6.99.5							GALL_all_39320		GALL_all_50770					GALL_all_91890
		subunit B	nuoC	1.6.99.5							GALL_all_39330		GALL_all_50780					GALL_all_91900
		subunit D	nuoD	1.6.99.5							GALL_all_39340 - GALL_all_39350		GALL_all_50790					GALL_all_91910
		subunit E	nuoE	1.6.99.5							GALL_all_39360		GALL_all_50800					GALL_all_91920
		subunit F	nuoF	1.6.99.5							GALL_all_39370		GALL_all_50810					GALL_all_91930
		subunit G	nuoG	1.6.99.5							GALL_all_39380		GALL_all_50820					GALL_all_91940
		subunit H	nuoH	1.6.99.5							GALL_all_39390		GALL_all_50830					GALL_all_91950
		subunit I	nuoI	1.6.99.5							GALL_all_39400		GALL_all_50840					GALL_all_91960
		subunit J	nuoJ	1.6.99.5							GALL_all_39410		GALL_all_50850					GALL_all_91970
		subunit K	nuoK	1.6.99.5							GALL_all_39420		GALL_all_50860					GALL_all_91980
		subunit L	nuoL	1.6.99.5							GALL_all_39430		GALL_all_50870					GALL_all_91990
		subunit M	nuoM	1.6.99.5							GALL_all_39440		GALL_all_50880					GALL_all_92000
		subunit N	nuoN	1.6.99.5							GALL_all_39450		GALL_all_50890					GALL_all_92010
downhill transfer
alternative complex (AC) III equivalent of Mariprofundus ferrooxydans PV-1	hypothetical protein									GALL_all_33470					GALL_all_69040				GALL_all_92890
	hypothetical protein									GALL_all_33480					GALL_all_69050				GALL_all_92880
	hypothetical protein									GALL_all_33490					GALL_all_69060				GALL_all_92870
	polysulphide reductase, NrfD									GALL_all_33500					GALL_all_69070				GALL_all_92860
	tetrathionate reductase subunit B precursor									GALL_all_33510					GALL_all_69080				GALL_all_92850
	polysulfide reductase chain A precursor									GALL_all_33520					GALL_all_69090				GALL_all_92840
	hypothetical protein									GALL_all_33530					GALL_all_69100				GALL_all_92830
	cytochrome C and quinol oxidase polypeptide I				GALL_all_02330	GALL_all_15970								GALL_all_65650
	cytochrome-cbb3 oxidase	subunit I			GALL_all_02120	GALL_all_16170								GALL_all_65840
	cytochrome-cbb3 oxidase	subunit I																				GALL_all_157580						GALL_all_219030	GALL_all_228190
	cytochrome-cbb3 oxidase	subunit II																				GALL_all_157590						GALL_all_219040	GALL_all_228200
	cytochrome-cbb3 oxidase	subunit III																				GALL_all_157610						GALL_all_219060	GALL_all_228220
	cytochrome oxidase maturation protein cbb3-type																					GALL_all_157660						GALL_all_219110	GALL_all_228270
	cytochrome bd ubiquinol oxidase	subunit II	cydB	1.10.3.10																					GALL_all_18520			GALL_all_218970	GALL_all_228130	GALL_all_231120
		subunit I	cydA	1.10.3.10																					GALL_all_18510			GALL_all_218980	GALL_all_228140	GALL_all_231130
	cytochrome B561 (?)	(homologous Slit_0172, Slit_2051 of S. lithotrophicus strain ES-1)				GALL_all_15020		GALL_all_26330					GALL_all_48620, GALL_all_51000							GALL_all_136620	GALL_all_156750			GALL_all_179730			GALL_all_216620				GALL_all_236420
		(homologous to Slit_1321)					GALL_all_22700		GALL_all_29540		GALL_all_38750	GALL_all_45060						GALL_all_91330
		(homologous to Slit_2245)			GALL_all_06560		GALL_all_184400																GALL_all_160080
ATP synthesis					Gall_all_contig000003	Gall_all_contig000006	Gall_all_contig000019	Gall_all_contig000021	Gall_all_contig000023	Gall_all_contig000215
ATP synthase, F0F1	ATP synthase subunit beta		atpD	3.6.3.14	GALL_all_17280	GALL_all_28000	GALL_all_66690		GALL_all_76710	GALL_all_249690
	ATP synthase epsilon chain		atpC	3.6.3.14	GALL_all_17290	GALL_all_28010	GALL_all_66700		GALL_all_76700	GALL_all_249680
	F0F1-ATPase subunit (ATPase_gene1)			3.6.3.14	GALL_all_17300	GALL_all_27930	GALL_all_66710		GALL_all_76780	GALL_all_249760
	ATPase (subunit ?)		atpH	3.6.3.14	GALL_all_17310	GALL_all_27970	GALL_all_66720		GALL_all_76740	GALL_all_249720
	ATP synthase subunit a		atpB	3.6.3.14	GALL_all_17320	GALL_all_27940	GALL_all_66730		GALL_all_76770	GALL_all_249750
	ATP synthase subunit c, sodium ion specific		atpE	3.6.3.14	GALL_all_17330	GALL_all_27950	GALL_all_66740		GALL_all_76760	GALL_all_249740
	ATP synthase subunit b		atpF	3.6.3.14	GALL_all_17340	GALL_all_27960	GALL_all_66750		GALL_all_76750	GALL_all_249730
	ATP synthase subunit alpha		atpA	3.6.3.14	GALL_all_17350	GALL_all_27980	GALL_all_66760		GALL_all_76730	GALL_all_249710
	ATP synthase gamma chain		atpG	3.6.3.14	GALL_all_17360	GALL_all_27990	GALL_all_66770		GALL_all_76720	GALL_all_249700
	V-type sodium ATPase subunit D		ntpD					GALL_all_73460
	V-type sodium ATPase subunit B		ntpB					GALL_all_73470
	V-type sodium ATPase catalytic subunit A		ntpA					GALL_all_73480
	V-type proton ATPase subunit E		atpE					GALL_all_73490
	V-type ATP synthase subunit F		atpF					GALL_all_73500
	V-type sodium ATPase subunit K		ntpK					GALL_all_73510
	V-type ATP synthase subunit I							GALL_all_73580
	V-type ATP synthase subunit C		atpC					GALL_all_73590
Other redox reactions connected to the quinol pool					Gall_all_contig000003	Gall_all_contig000005	Gall_all_contig000007	Gall_all_contig000011	Gall_all_contig000019	Gall_all_contig000026	Gall_all_contig000192
	succinate dehydrogenase	subunit B	sdhC	1.3.5.1		GALL_all_23120	GALL_all_30080	GALL_all_44560
		subunit A	sdhD	1.3.5.1		GALL_all_23110	GALL_all_30090	GALL_all_44550
		subunit D	sdhA	1.3.5.1		GALL_all_23100	GALL_all_30100	GALL_all_44540
		subunit C	sdhB	1.3.5.1		GALL_all_23090	GALL_all_30110	GALL_all_44530
	sulfide:quinone oxidoreductase			1.8.5.-		GALL_all_23910	GALL_all_31330	GALL_all_43460
	rhodanese-related sulfurtransferase				GALL_all_15730				GALL_all_65410
	electron transfer flavoprotein	alpha subunit	etfA							GALL_all_83690	GALL_all_238970
		beta subunit	etfB							GALL_all_83680	GALL_all_238980
	electron transfer flavoprotein ubiquinone oxidoreductase			1.5.5.1						GALL_all_83670	GALL_all_238990
Putative formate hydrogenlyase					Gall_all_contig000001	Gall_all_contig000003	Gall_all_contig000006
	hydrogenase 4	subunit B	hyfB		GALL_all_03470	GALL_all_15230
	formate hydrogenlyase	subunit 4	hycD		GALL_all_03480	GALL_all_15220
	hydrogenase-4	component E	hyfE		GALL_all_03490	GALL_all_15210
	hydrogenase 4	subunit F	hyfB		GALL_all_03500	GALL_all_15200
	formate hydrogenlyase	subunit 5 precursor	hycE		GALL_all_03510	GALL_all_15190
	formate hydrogenlyase	subunit 7	hycG		GALL_all_03520	GALL_all_15180
	putative MFS-type transporter YhjX						GALL_all_25500
	formate dehydrogenase, gamma subunit						GALL_all_25510
	formate dehydrogenase, beta subunit						GALL_all_25520
	formate dehydrogenase, alpha subunit	(AFE_1652, AFE_0690)					GALL_all_25530
	formate dehydrogenase accessory protein FdhD	(AFE_1654, AFE_0690)					GALL_all_25540
	formate dehydrogenase, delta subunit						GALL_all_25550
Rnf complex					Gall_all_contig000001	Gall_all_contig000003	Gall_all_contig000009	Gall_all_contig000013	Gall_all_contig000035	Gall_all_contig000139
	electron transport complex subunit RnfA		rnfA				GALL_all_36980	GALL_all_48720	GALL_all_100640
	electron transport complex subunit RnfB		rnfB				GALL_all_36990	GALL_all_48730	GALL_all_100660
	electron transport complex subunit RnfC		rnfC				GALL_all_37000	GALL_all_48740	GALL_all_100670
	electron transport complex subunit RsxD		rsxD				GALL_all_37020	GALL_all_48750	GALL_all_100690
	electron transport complex subunit RnfG		rnfG				GALL_all_37030	GALL_all_48760	GALL_all_100700
	electron transport complex subunit RnfE		rnfE				GALL_all_37040	GALL_all_48770	GALL_all_100710
	electron transport complex subunit RsxB		rsxB		GALL_all_04310	GALL_all_14420				GALL_all_209820
	pyruvate-flavodoxin oxidoreductase		nifJ		GALL_all_04320	GALL_all_14410				GALL_all_209830
	electron transport complex subunit RsxC		rsxC		GALL_all_04330	GALL_all_14400				GALL_all_209840
	electron transport complex subunit RsxD		rsxD		GALL_all_04340	GALL_all_14390				GALL_all_209850
	electron transport complex subunit RsxG		rsxG		GALL_all_04350	GALL_all_14380				GALL_all_209860
	electron transport complex subunit RnfE		rnfE		GALL_all_04360	GALL_all_14370				GALL_all_209870
	electron transport complex subunit RsxA		rsxA		GALL_all_04370	GALL_all_14360				GALL_all_209880
Putative pathway for the oxidation of reduced sulfur compounds					Gall_all_contig000005	Gall_all_contig000007	Gall_all_contig000009	Gall_all_contig000011	Gall_all_contig000013	Gall_all_contig000035	Gall_all_contig000067
	sulfur oxidation protein SoxB / thiosulfohydrolase SoxB		soxB								GALL_all_145530
	sulfur oxidation c-type cytochrome SoxA		soxA								GALL_all_145540
	sulphur oxidation protein SoxZ / thiosulfate oxidation carrier complex protein SoxZ		soxZ								GALL_all_145550
	sulfur oxidation protein SoxY / thiosulfate oxidation carrier protein SoxY		soxY								GALL_all_145560
	sulfur oxidation c-type cytochrome SoxX		soxX								GALL_all_145570
	hypothetical protein										GALL_all_145580
	ECF RNA polymerase sigma factor SigH		sigH								GALL_all_145590
	hypothetical protein										GALL_all_145600
	sulfur reduction protein DsrE		dsrE								GALL_all_145610
	hypothetical protein										GALL_all_145620
	DsrE/DsrF-like family protein										GALL_all_145630
	disulfide bond isomerase DsbC/G-like protein		dsbC								GALL_all_145640
	DsrE/DsrF-like family protein										GALL_all_145650
	sulfate-binding protein precursor		sbpA								GALL_all_145660
	SoxR reducing system protein RseC				GALL_all_22270	GALL_all_29040	GALL_all_37520	GALL_all_45530	GALL_all_49090	GALL_all_100140
	sulfite reductase, dissimilatory-type subunit alpha		dsvA		GALL_all_24200	GALL_all_31690		GALL_all_43090
	sulfite reductase, dissimilatory-type subunit beta		dsvB		GALL_all_24210	GALL_all_31700		GALL_all_43080
	sulfurtransferase DsrE		dsrE		GALL_all_24220	GALL_all_31710		GALL_all_43070
	sulfurtransferase TusC / Sulfite reductase, dissimilatory-type, subunit DsrF		dsrF		GALL_all_24230	GALL_all_31720		GALL_all_43060
	sulfurtransferase TusB		tusB		GALL_all_24240	GALL_all_31730		GALL_all_43050
	sulfurtransferase TusE		tusE		GALL_all_24250	GALL_all_31740		GALL_all_43040
	sulfite reductase, dissimilatory-type, subunit DsrM / nitrate reductase gamma subunit				GALL_all_24260	GALL_all_31750		GALL_all_43030
	sulfite reductase, dissimilatory-type, subunit DsrK / succinate dehydrogenase / fumarate reductase iron-sulfur subunit				GALL_all_24270	GALL_all_31760		GALL_all_43020
	glutamate synthase		gltD		GALL_all_24280	GALL_all_31770		GALL_all_43010
	hypothetical protein / Sulfite reductase, dissimilatory-type, subunit DsrJ				GALL_all_24290	GALL_all_31780		GALL_all_43000
	4Fe-4S ferredoxinn / tetrathionate reductase subunit B precursor		ttrB		GALL_all_24300	GALL_all_31790		GALL_all_42990
	molybdopterin oxidoreductase / Sulfite reductase, dissimilatory-type, subunit DsrP				GALL_all_24310	GALL_all_31800		GALL_all_42980

## Sheet: F) pH homeostasis
F) pH homeostasis: membrane structure and potassium uptake; please see under Supplementary Table 4B for strategies related to urease and cyanophycin synthetase activity and under Supplementary Table 43 regarding formate hydrogenlyase activity
pathway		name	gene name (if assigned)	EC number	Locus_Tag and contig
Acid stress					GALL_all_contig000001	GALL_all_contig000005	GALL_all_contig000006	GALL_all_contig000007	GALL_all_contig000008	GALL_all_contig000009	GALL_all_contig000011	GALL_all_contig000030	GALL_all_contig000047	GALL_all_contig000049	GALL_all_contig000055	GALL_all_contig000077	GALL_all_contig000086	GALL_all_contig000366	GALL_all_contig000769
membrane structure		cyclopropane-fatty-acyl-phospholipid synthase	cfa	2.1.1.79			GALL_all_25670			GALL_all_37940		GALL_all_90390		GALL_all_122970	GALL_all_131360		GALL_all_167290
potassium uptake		Low affinity potassium transport system protein Kup	kup		GALL_all_05210, GALL_all_05270									GALL_all_122900	GALL_all_131430			GALL_all_295350
		voltage-gated potassium channel Kch	kch			GALL_all_22470		GALL_all_29240			GALL_all_45330
		Trk system potassium uptake protein TrkA	trkA				GALL_all_28350
		Trk system potassium uptake protein TrkH	trkH				GALL_all_28360
		Kef-type K+ transport systems	kefC						GALL_all_35740				GALL_all_119390			GALL_all_157880
high affinity potassium uptake		F subunit of K+-transporting ATPase (KdpF)			GALL_all_05290									GALL_all_122920	GALL_all_131410				GALL_all_354420
		potassium-transporting ATPase A chain	kdpA	3.6.3.12	GALL_all_05300									GALL_all_122930	GALL_all_131400
		potassium-transporting ATPase B chain	kdpB	3.6.3.12	GALL_all_05310									GALL_all_122940	GALL_all_131390
		potassium-transporting ATPase C chain	kdpC	3.6.3.12	GALL_all_05320									GALL_all_122950	GALL_all_131380
		sensor protein KdpD	kdpD		GALL_all_05330									GALL_all_122990	GALL_all_131340
		KDP operon transcriptional regulatory protein KdpE	kdpE	1.3.5.2	GALL_all_05340									GALL_all_123000	GALL_all_131330
